# Supplementary material for: Synergism, Bifunctionality, and the Evolution of a Gradual Sensory Trade-off in Hummingbird Taste Receptors
Source: PubMed Central journal article supplement (PMC8826506; doi:10.1093/molbev/msab367), 2022-01-03
Supplement: msab367_supplementary_data.pdf [file msab367_supplementary_data.pdf]

1 **Supplemental information for “Synergism, bifunctionality, and the evolution of a gradual**  
2 **sensory trade-off in hummingbird taste receptors”**

3 Glenn Cockburn, Meng-Ching Ko, Keren R. Sadanandan, Eliot T. Miller, Tomoya Nakagita,  
4 Amanda Monte, Sungbo Cho, Eugeni Roura, Yasuka Toda, Maude W. Baldwin\*

5 \* corresponding author: mbaldwin@orn.mpg.de

6

7

8 **Supplemental Figure 1.** Behavioral responses of wild hummingbirds to different combinations  
9 of sugars and amino acids.

10

11 **Supplemental Figure 2.** Chimeric dissection of ancestral pairs (AR1 and AR2).

12

13 **Supplemental Figure 3.** Tests of positive selection in the hummingbird clade.

14

15 **Supplemental Figure 4.** Responses of hummingbird T1R1-T1R3 to carbohydrates and amino  
16 acids.

17

18 **Supplemental Figure 5.** Synergistic responses of Anna’s hummingbird and saw-billed hermit  
19 T1R1-T1R3 receptors to combinations of amino acids and sugars.

20

21 **Supplemental Table 1.** Natural history traits of tested hummingbirds.

22

23 **Supplemental Table 2.** Normalized ligand responses.

24

25 **Supplemental Table 3.** Location of AR2 residues in T1R1 CRD-TMD.

26

27 **Supplemental Table 4:** Sample sizes for behavioral trials with wild hummingbirds.

28

29

30

31

32

33

34

35 **Supplemental Figure 1.** Behavioral responses of wild hummingbirds to different combinations  
36 of sugars and amino acids.

37 **(a-f)** Drinking bout lengths from a wild population of hummingbirds (primarily Anna's and black-  
38 chinned hummingbirds) presented with sugars and amino acids. **(a-c)** Responses to  
39 simultaneous presentation of 500 mM carbohydrates for **(a)** all birds (all species and sexes), as  
40 well as responses separated by species and sex: **(b)** black-chinned males (see Fig. 1c for  
41 Anna's males), and **(c)** females (all species). All groups show strong sucrose preferences. **(d)**  
42 In the absence of sucrose, fructose (500 mM) is preferred, data from both sexes and all species  
43 combined. **(e)** Responses from all birds for trials with amino acid solutions (1.5 M). Tests with  
44 three receptor agonists—alanine, serine, and glycine—but not proline (which does not activate  
45 the hummingbird receptor, Fig. 1b) elicited longer drinking bouts than paired water controls (see  
46 Fig. 1d for Anna's hummingbird males). **(f)** Lower-concentration (500 mM) solutions of serine  
47 evoked some long bouts, but the difference between bout lengths compared to water controls  
48 was not significant (see Fig. 1e for Anna's hummingbird males). Asterisks denote  $p < 0.05$ , two-  
49 sample Kolmogorov-Smirnov tests; see Supplemental Table 4 for sample sizes.

50

51

52

53

54

55

56

57

58

59

60

61

62

63

64

65

66

67

68

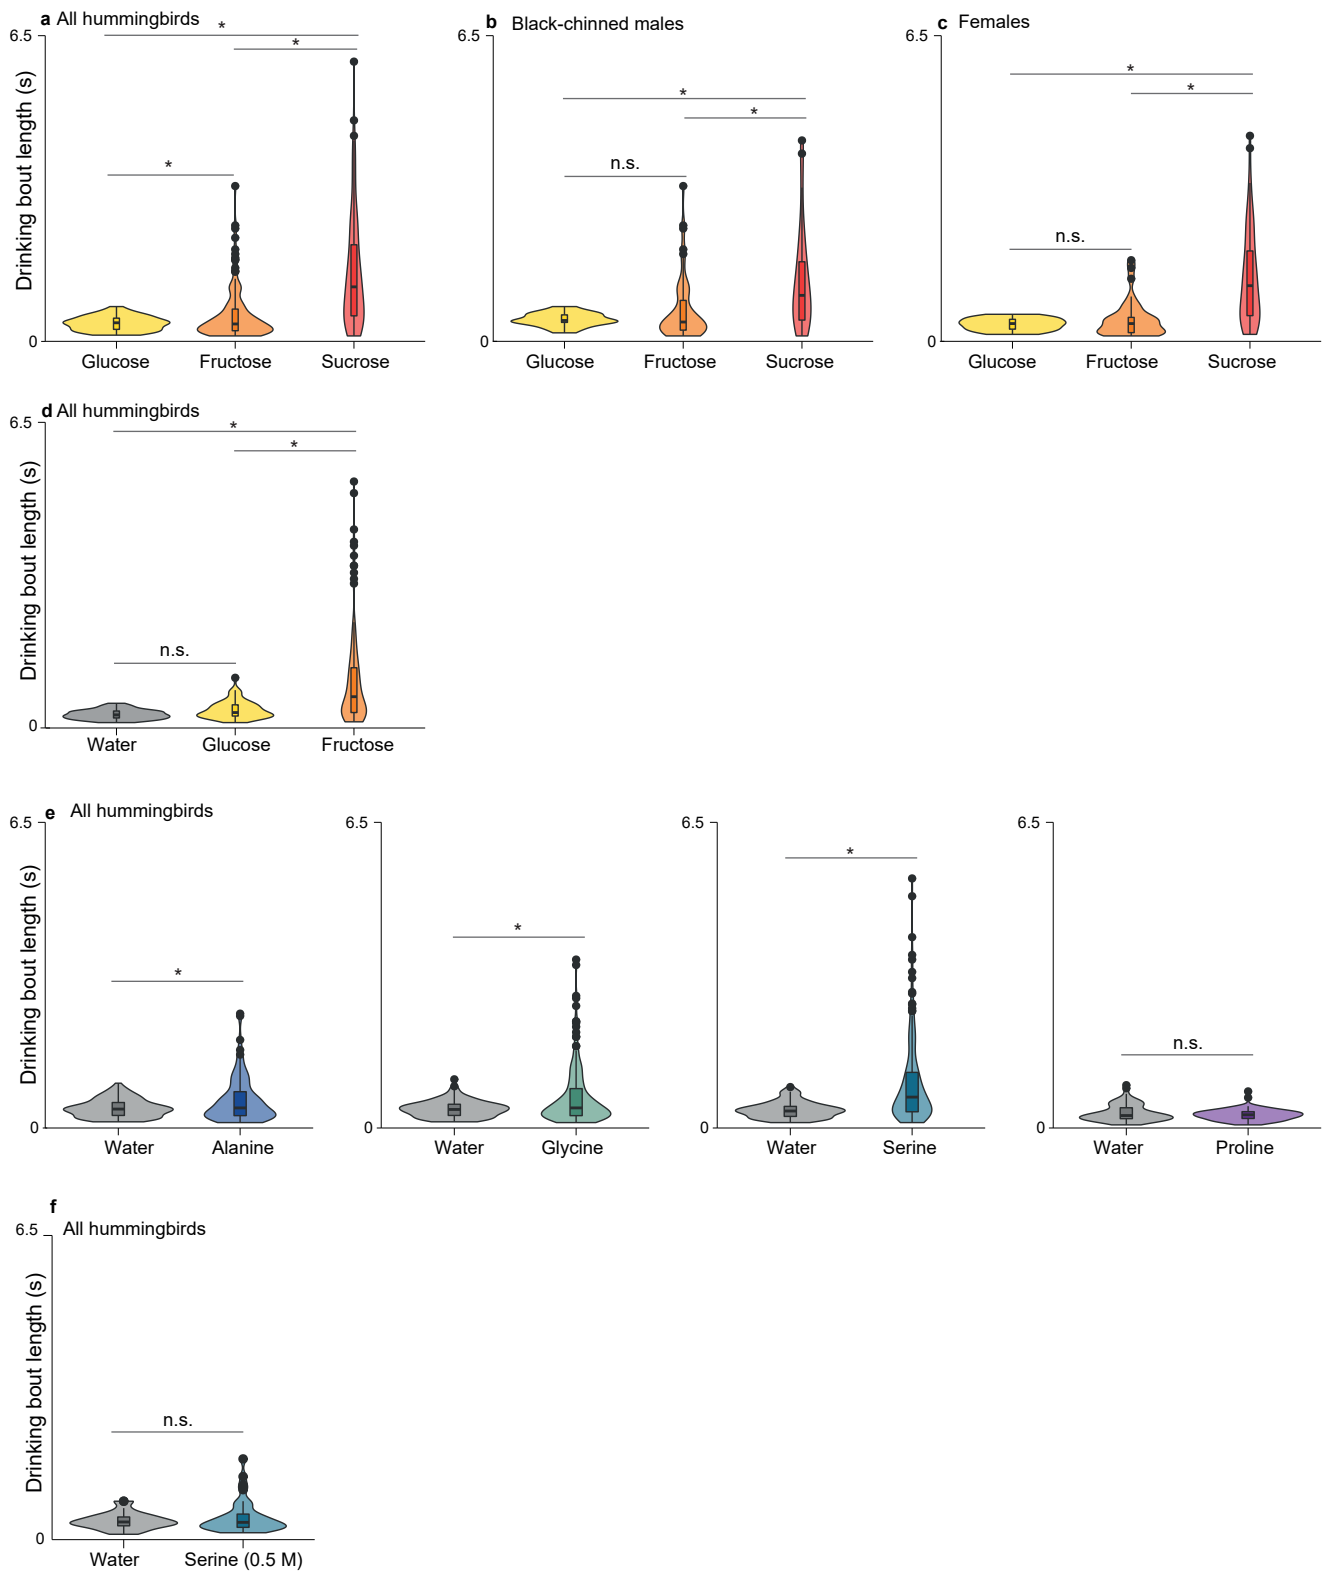

Supplemental Figure 1

70 **Supplemental Figure 2.** Chimeric dissection of ancestral pairs (AR1 and AR2).  
71 **(a)** Schematic of T1R1-T1R3 heterodimer indicating receptor domains, and diagram depicting  
72 the sequence identities (as a percentage of sequence length, number of coding differences  
73 given in parentheses) between receptors from different species (chicken, chimney swift, black  
74 jacobin, Anna's hummingbird) and ancestral nodes (AR1 and AR2). **(b)** Alignment of 19  
75 previously-identified residues (Baldwin et al. 2014) with our ancestral receptors and the  
76 hummingbirds cloned in this study; 10 of these 19 residues differ between ancestors, and 9  
77 (highlighted in yellow) are conserved across the 8 examined hummingbirds. **(c)** Responses of  
78 ancestral receptors to sucrose, sucralose, alanine and no-ligand control. AR1 responds only to  
79 amino acids, whereas AR2 responds robustly both to sugars as well as amino acids ( $n = 6$ ,  
80 mean  $\pm$  SE;  $*p < 0.05$ ). Mixed pairs of heterodimers comprising AR1 & AR2 fail to respond  
81 strongly to sucrose and sucralose. **(d)** Domain chimeras between AR1 and AR2 demonstrate a  
82 critical role of T1R1 CRD+TMD and T1R3 VFT. **(e)** The domain combination underlying  
83 songbird sweet taste acquisition (T1R1-VFT and T1R3-CRD-TMD (Toda et al. 2021)) does not  
84 evoke a response to sugars or sweeteners in hummingbirds. In hummingbirds, the strongest  
85 sucralose responses were observed when both domains were present. **(f)** Dissection of the  
86 T1R3 VFT domain reveals highest responses from the second domain quarter, consistent with  
87 previous findings (Baldwin et al. 2014). **(g)** When expressed with AR1 T1R1, this second VFT  
88 domain quarter does not show any sugar or sweetener response, underscoring the role of the  
89 CRD-TM domain of T1R1. **(h)** By examining patterns of conservation and radical change (see  
90 Methods), a subset of 5 residues from the second quarter of the VFT were tested with the AR2  
91 CRD-TMD chimera; interestingly, responses to sucralose from this smaller residue subset were  
92 elevated compared with the responses from the second domain chimera (when both were co-  
93 expressed with the CRD-TMD chimera) in f. **(i)** A similar approach to narrow down CRD-TMD  
94 residues, from an initial 40 differences between receptor pairs, to 22 (using radical changes) or  
95 17 (using BLOSUM62 similarity scores) did not capture the relevant residues, and no response  
96 to sucralose was recovered. **(j)** Alignment of a subset of the dissected region of the T1R3  
97 domain, showing the five examined residues (yellow highlighting; asterisks indicate residues  
98 discussed in Baldwin et al. (2014)). A more extensive chimeric dissection will be required to  
99 uncover the full set of necessary and sufficient residues across both T1R1 and T1R3 underlying  
100 hummingbird sugar sensing.

101

102

103



105 **Supplemental Figure 3.** Tests of positive selection in the hummingbird clade.  
106 **(a)** Tests of positive selection (aBSREL branch models (Smith et al. 2015)) suggest selection on  
107 T1R3 at the base of the hummingbird radiation (red branches: uncorrected  $p$ -value < 0.05). **(b)**  
108 In free-ratio models (CODEML; PAML v4.8a, (Yang 2007)), T1R3 has higher ratios of non-  
109 synonymous to synonymous rates ( $\omega$ ) on many branches compared with T1R1. **(c)** Site-wise  $\omega$   
110 values from M8 (CODEML) are shown, as well as the location of residues predicted to be under  
111 selection by site models implemented in CODEML (orange, BEB sites from M8 (Yang 2005);  
112 asterisks indicate  $Pr > 0.95$ ) or in MEME (Murrell et al. 2012) (yellow;  $p < 0.05$ ). Little overlap is  
113 seen with sites determined by chimeric dissection (black) with the exception of site 175 (T1R3),  
114 and five sites in T1R1 (see Supplemental Table 3).

115

116

117

118

119

120

121

122

123

124

125

126

127

128

129

130

131

132

133

134

135

136

137

138

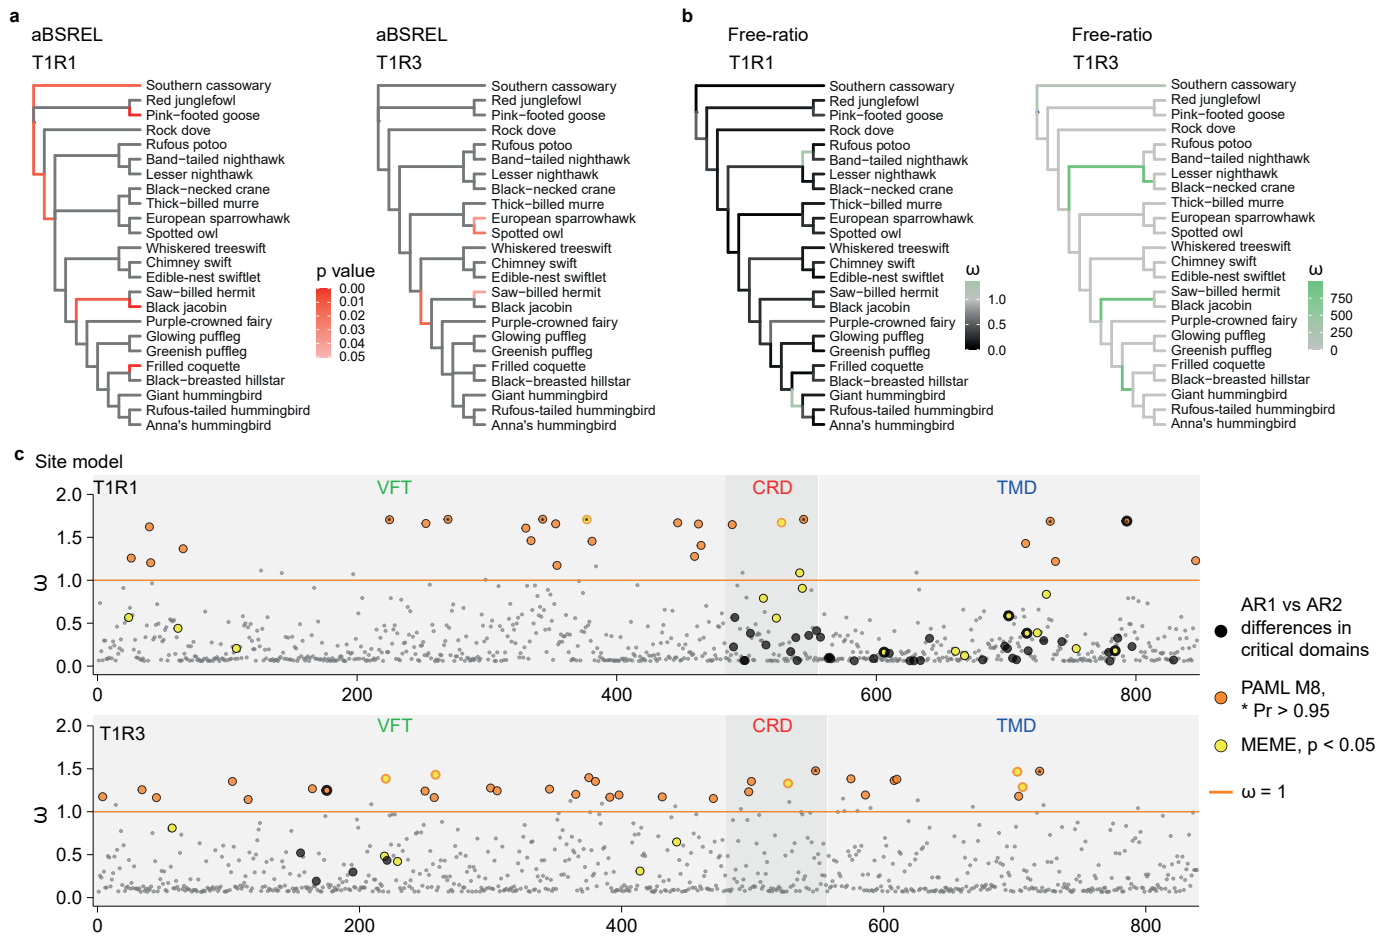

Supplemental Figure 3

140 **Supplemental Figure 4.** Responses of hummingbird T1R1-T1R3 to carbohydrates and amino  
141 acids.

142 **(a)** Bar plots of single ligand plots ( $n = 6$ , mean  $\pm$  SE) for eight hummingbirds, the swift and the  
143 two ancestral reconstructions as well as responses from untransfected control cells.  
144 Carbohydrates and sucralose are in light orange, amino acids are in light blue and no-ligand  
145 controls are shown in gray. Asterisks denote  $p$ -values  $< 0.05$  after multiple correction by ligand  
146 using the Holm method. **(b)** Phylogenetic PCA (phyloPCA) of log-transformed responses  
147 including the swift. **(c)** Hummingbird-wide average; responses are similar to Figure 3a (see also  
148 Supplemental Table 2).

149

150

151

152

153

154

155

156

157

158

159

160

161

162

163

164

165

166

167

168

169

170

171

172

173

174



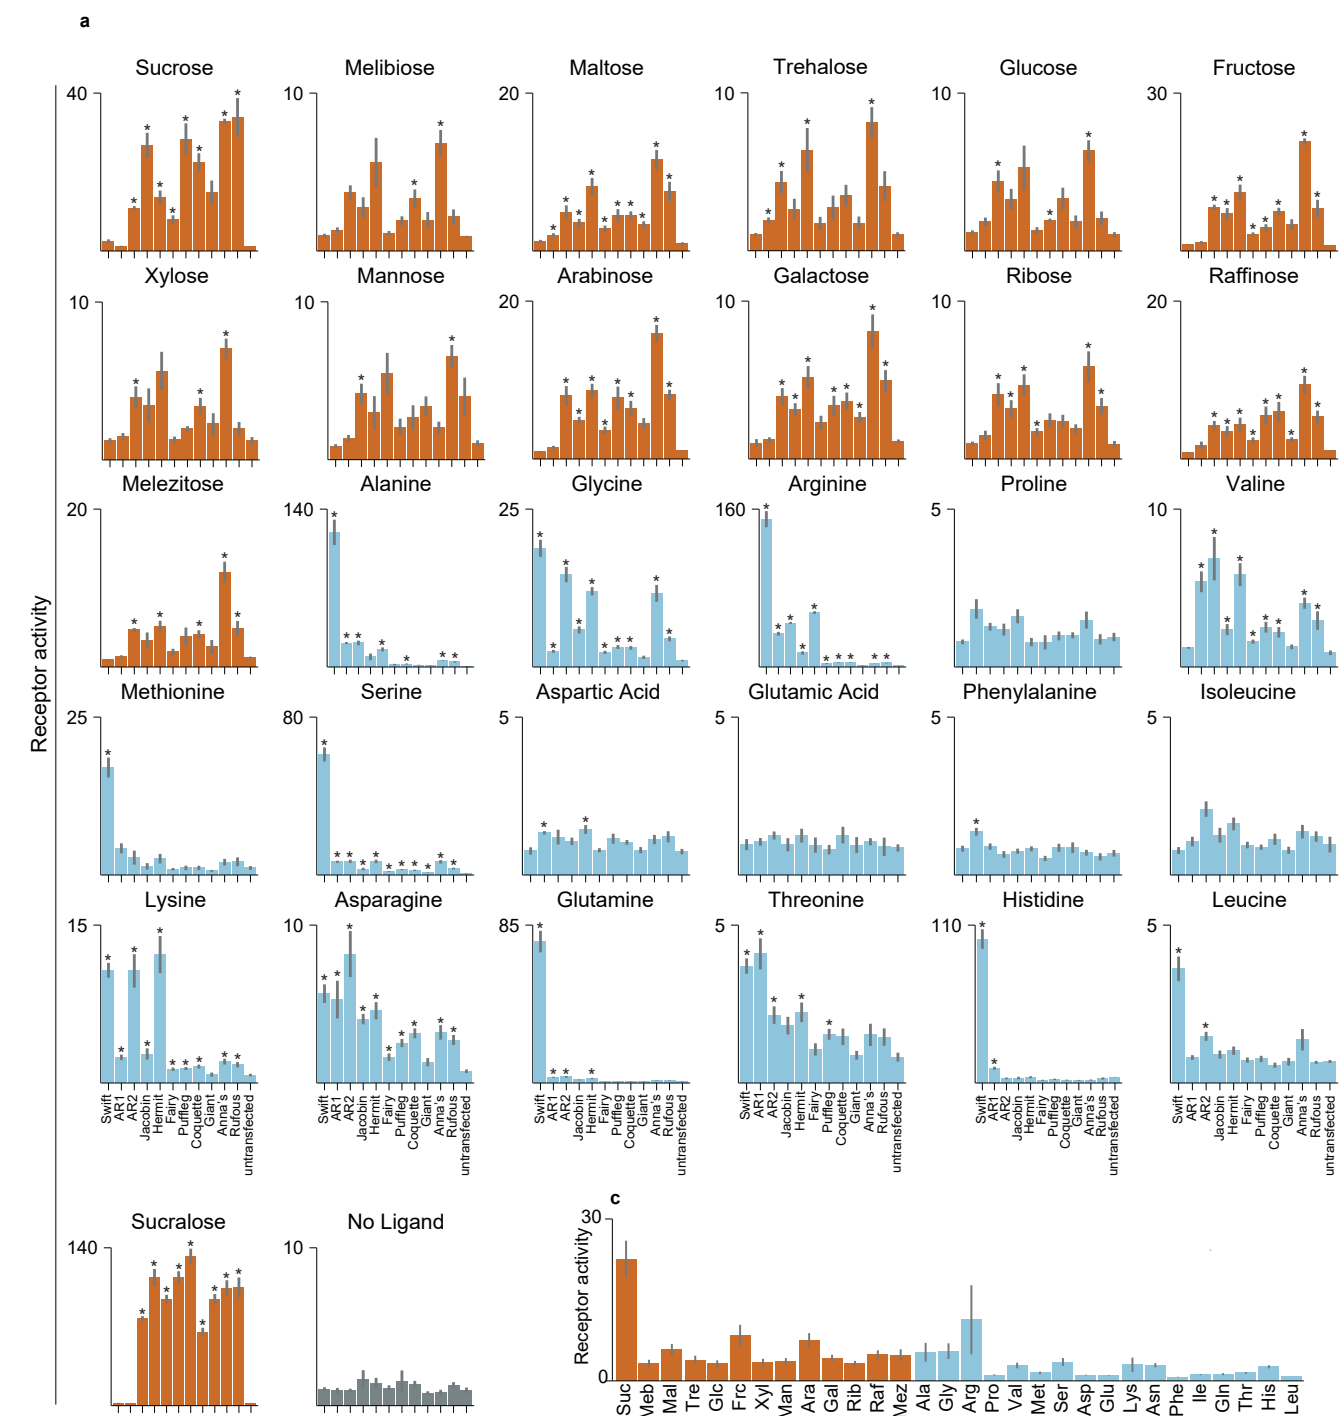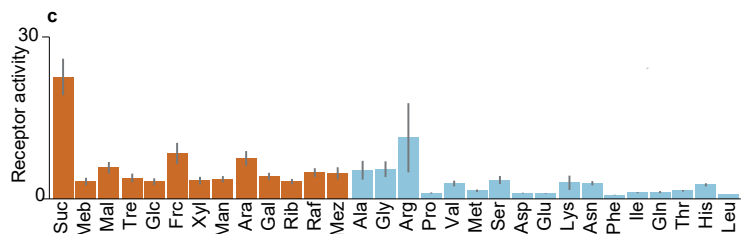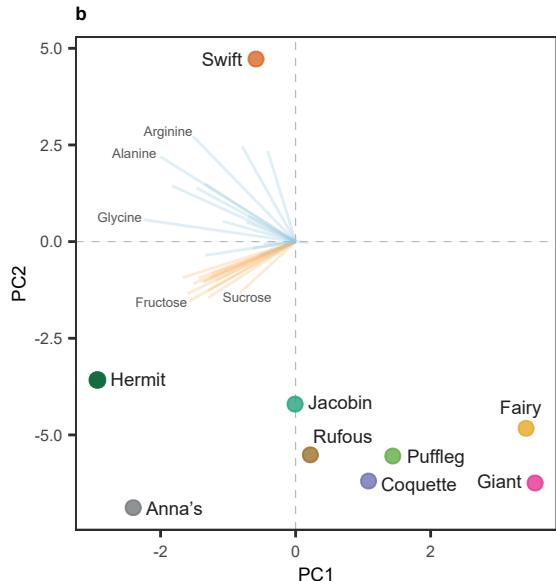

Supplemental Figure 4

176 **Supplemental Figure 5.** Synergistic responses of Anna's hummingbird and saw-billed hermit  
177 T1R1-T1R3 receptors to combinations of amino acids and sugars.

178 **(a,b)** Alanine also enhances responses to two monosaccharides (fructose and glucose)  
179 commonly found in nectar; observed responses larger than simple additive responses are seen  
180 when both sugars are presented in combination with 10 mM alanine (\* $p < 0.05$ , Welch's two-  
181 tailed  $t$ -test; mean  $\pm$  SE,  $n = 4$ ). The average values for 100 mM fructose and glucose ( $n = 6$  for  
182 each) are indicated by dashed orange and yellow lines. **(c)** Proline does not enhance responses  
183 of the Anna's T1R1-T1R3 receptor when combined with sucrose (\* $p < 0.05$ , Welch's two-tailed  
184  $t$ -test; mean  $\pm$  SE,  $n = 4$ ; average value for 100 mM sucrose ( $n = 6$ ) indicated by dashed line).  
185 **(d)** Synergy between glycine and sucrose is also observed in responses of the saw-billed  
186 hermit, from concentrations of 25 mM onward (\* $p < 0.05$ , Welch's two-tailed  $t$ -test; mean  $\pm$  SE,  $n$   
187 = 4; average value for 100 mM sucrose ( $n = 6$ ) indicated by dashed line). **(e)** Saw-billed hermit  
188 receptors show synergism between 50 mM sucrose and 7 of 15 tested amino acids (blue, amino  
189 acid response; striped bar, amino acid + sucrose; gray, estimated additive response; \* $p < 0.01$ ,  
190 Welch's two-tailed  $t$ -test; mean  $\pm$  SE,  $n = 4$ ); no ligand controls ('buf' = buffer) are shown.

191  
192  
193  
194  
195  
196  
197  
198  
199  
200  
201  
202  
203  
204  
205  
206  
207  
208  
209  
210  
211

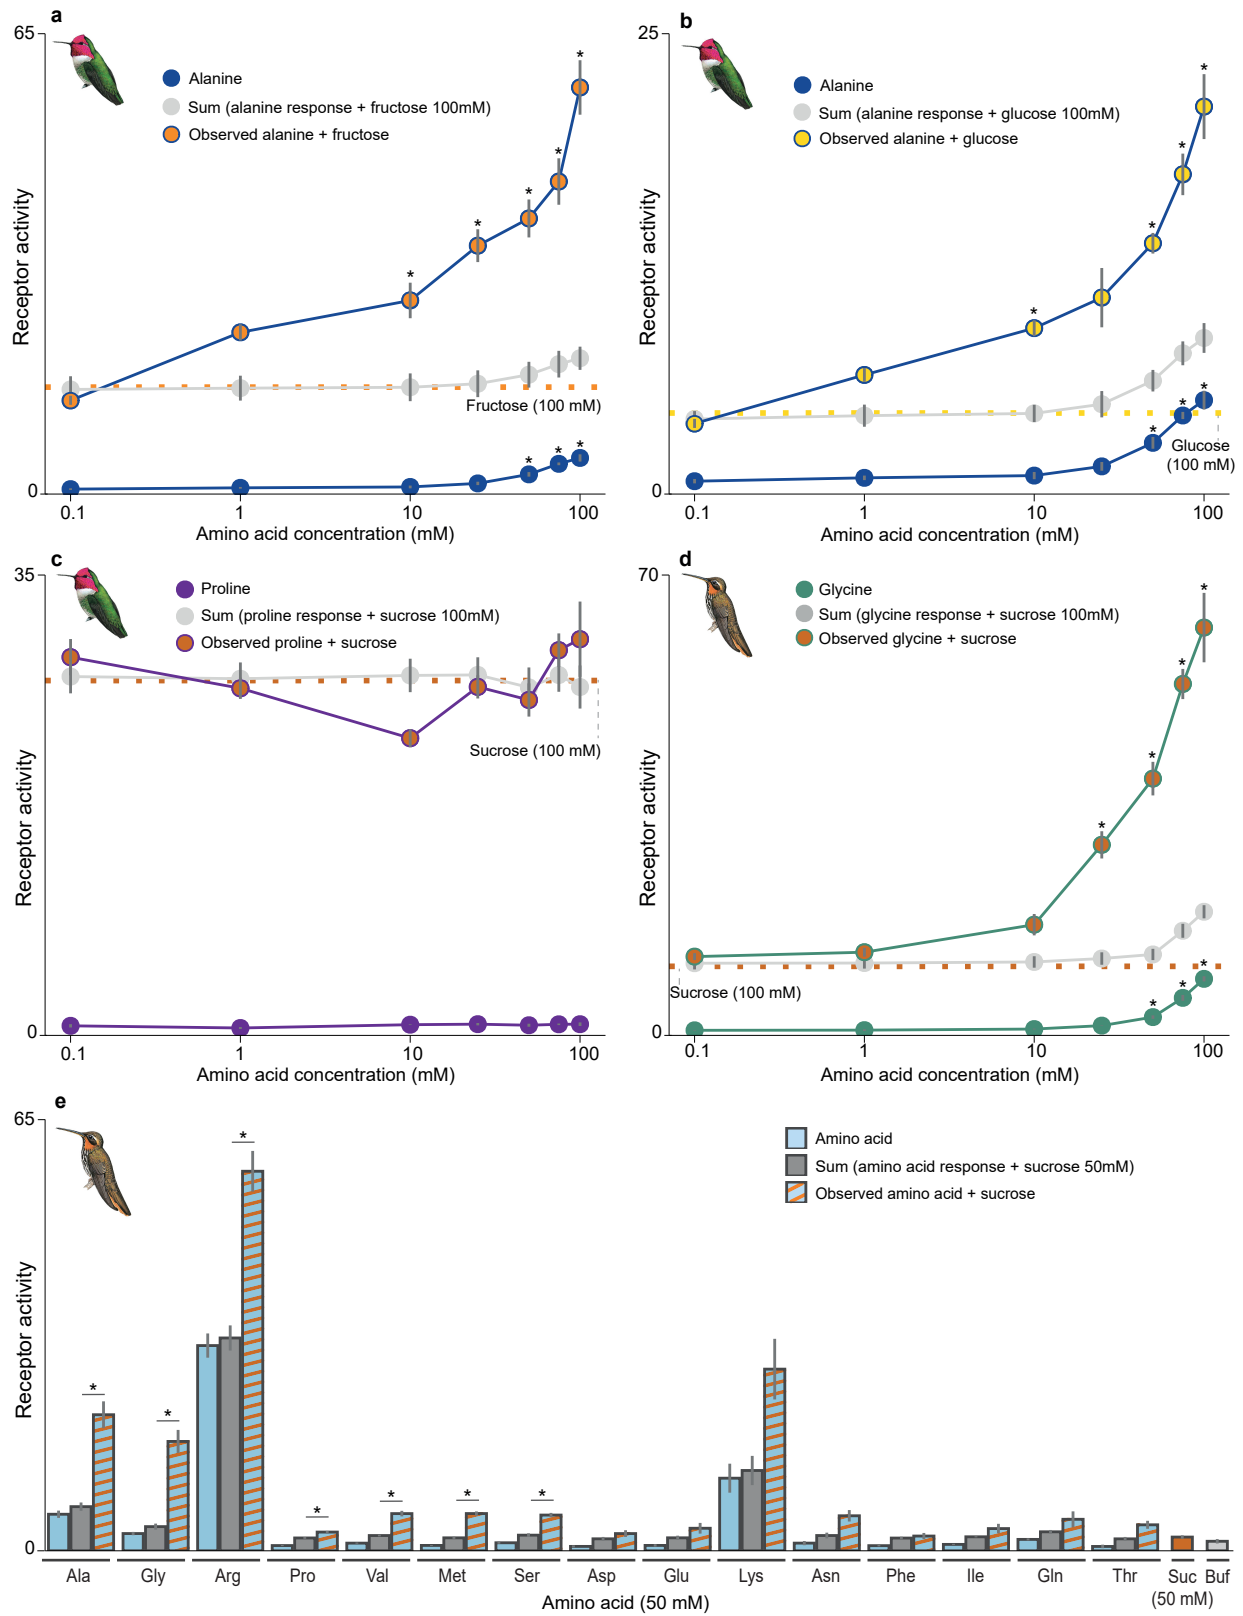

Supplemental Figure 5

213 **Supplemental Table 1.** Natural history traits of tested hummingbirds.  
214 Data on the mean weight (g), size (cm), elevation (m), migratory status, range size (km<sup>2</sup>) and  
215 plant families visited (see Methods) are shown for the eight species of hummingbird tested in  
216 this study.

217

218

219

220

221

222

223

224

225

226

227

228

229

230

231

232

233

234

235

236

237

238

239

240

241

242

243

244

245

**Supplemental Table 1. Natural history traits of tested hummingbirds**

| Species                                            | Mean weight (g) | Mean size (cm) | Mean elevation (m) | Migratory                     | Range size (km <sup>2</sup> ) | Plant families visited (Birds of the World)                                                                                   | Plants visited (Macaulay library)                                                                                 |
|----------------------------------------------------|-----------------|----------------|--------------------|-------------------------------|-------------------------------|-------------------------------------------------------------------------------------------------------------------------------|-------------------------------------------------------------------------------------------------------------------|
| Black jacobin<br><i>Florisuga fusca</i>            | 8               | 12.5           | 456.4              | Yes (primarily within Brazil) | 1,790,000                     | Euphorbiaceae, Malvaceae, Myrtaceae, Fabaceae, Bromeliaceae                                                                   | Variety of trees, shrubs, and epiphytes including numerous Fabaceae and Bignoniaceae                              |
| Saw-billed hermit<br><i>Ramphodon naevius</i>      | 8.2             | 15             | 515.5              | No                            | 517,000                       | Bromeliaceae, Costaceae, Fabaceae, Gesneriaceae, Heliconiaceae, Lobeliaceae, Rubiaceae, Malvaceae, Marcgraviaceae, Caricaceae | Shrubs and epiphytes, particularly <i>Heliconia</i> , <i>Costus</i> , <i>Justicia</i> , <i>Centropogon</i> , etc. |
| Purple crowned fairy<br><i>Heliostyris barroti</i> | 5.47            | 11             | 373.9              | No                            | 2,200,000                     | Passifloraceae, Bromeliaceae, Heliconiaceae                                                                                   | Wide variety of plants, but frequently seen at Fabaceae trees                                                     |
| Greenish puffleg<br><i>Haplophaedia aureliae</i>   | 5.5             | 10             | 1961.7             | No                            | 435,000                       |                                                                                                                               | Small flowering plants, particularly Ericaceae                                                                    |
| Friiled coquette<br><i>Lophornis magnificus</i>    | 2.66            | 7.5            | 561.5              | No                            | 3,080,000                     | Verbenaceae, Ranunculaceae, Rubiaceae, Malvaceae, Leguminosae, Myrtaceae, Acanthaceae, Polemoniaceae, Lamiaceae, Bromeliaceae | Small flowering plants, e.g. <i>Lantana</i> , <i>Stachytarpheta</i> , etc.                                        |
| Giant hummingbird<br><i>Patagona gigas</i>         | 19              | 21             | 3066.0             | No                            | 3,690,000                     | Scrophulariaceae, Passifloraceae, Loranthaceae, Myrtaceae, Mutiseae, Solanaceae, Campanulaceae, Bromeliaceae                  | <i>Puya</i> (and introduced <i>Agave</i> ), Cactaceae, variety of other shrubs                                    |
| Anna's hummingbird<br><i>Calypte anna</i>          | 4.5             | 10             | 640.6              | Yes                           | 1,580,000                     | Many plant families visited including non-native. Ericaceae, Phrymaceae, Lamiaceae, Plantaginaceae, Onagraceae,               | Wide variety, particularly small herbs in the order Lamiales                                                      |

Ranunculaceae, Thymelaeaceae

---

|                                                      |   |   |       |    |           |                                    |                                  |
|------------------------------------------------------|---|---|-------|----|-----------|------------------------------------|----------------------------------|
| Rufous-tailed hummingbird<br><i>Amazilia tzacatl</i> | 5 | 9 | 404.4 | No | 3,770,000 | Heliconiaceae, Musaceae, Rubiaceae | Wide variety of trees and shrubs |
|------------------------------------------------------|---|---|-------|----|-----------|------------------------------------|----------------------------------|

---

246  
247  
248  
249  
250  
251  
252  
253  
254  
255  
256  
257  
258  
259

260 **Supplemental Table 2.** Normalized ligand responses.

261 All eight hummingbirds responded most strongly to sucralose (Supplemental Figure 4a);  
262 therefore, to account for possible differences in transfection efficiency, we divided each  
263 species' ligand responses by the respective response to sucralose (Fig. 3a). Relative  
264 average responses were consistent in both normalized and non-normalized comparisons.  
265 Sucrose elicited the strongest response of all carbohydrates, followed by fructose and  
266 arabinose. Across species, sucrose responses were always the highest, and most species  
267 responded more to fructose than to arabinose. For amino acids, the hummingbird-wide  
268 average response to arginine was higher than to other amino acids in both comparisons  
269 (and arginine responses were highest for most species), followed by glycine and alanine. In  
270 Anna's hummingbirds, glycine evoked the highest amino acid response.

271

272

273

274

275

276

277

278

279

280

281

282

283

284

285

286

287

288

**Supplemental Table 2. Normalized ligand response**

| Species  | Mean amino acid / mean sucralose |            |            |            |            |            |            |            |            |            |            |            |            |            |            |            |            |
|----------|----------------------------------|------------|------------|------------|------------|------------|------------|------------|------------|------------|------------|------------|------------|------------|------------|------------|------------|
|          | <u>Ala</u>                       | <u>Gly</u> | <u>Arg</u> | <u>Pro</u> | <u>Val</u> | <u>Met</u> | <u>Ser</u> | <u>Asp</u> | <u>Glu</u> | <u>Phe</u> | <u>Ile</u> | <u>Lys</u> | <u>Asn</u> | <u>Gln</u> | <u>Thr</u> | <u>His</u> | <u>Leu</u> |
| Jacobin  | 0.08                             | 0.05       | 0.12       | 0.01       | 0.02       | 0.01       | 0.03       | 0.01       | 0.01       | 0.01       | 0.01       | 0.02       | 0.04       | 0.01       | 0.02       | 0.03       | 0.01       |
| Hermit   | 0.17                             | 0.13       | 0.58       | 0.02       | 0.06       | 0.03       | 0.07       | 0.02       | 0.01       | 0.01       | 0.02       | 0.13       | 0.05       | 0.03       | 0.02       | 0.04       | 0.01       |
| Fairy    | 0.02                             | 0.02       | 0.03       | 0.01       | 0.01       | 0.01       | 0.02       | 0.01       | 0.01       | 0.01       | 0.01       | 0.01       | 0.01       | 0.01       | 0.01       | 0.02       | 0.01       |
| Puffleg  | 0.02                             | 0.02       | 0.03       | 0.01       | 0.02       | 0.01       | 0.02       | 0.01       | 0.01       | 0.00       | 0.01       | 0.01       | 0.02       | 0.01       | 0.01       | 0.02       | 0.01       |
| Coquette | 0.02                             | 0.05       | 0.07       | 0.02       | 0.03       | 0.02       | 0.04       | 0.02       | 0.02       | 0.01       | 0.02       | 0.02       | 0.05       | 0.01       | 0.02       | 0.03       | 0.01       |
| Giant    | 0.01                             | 0.02       | 0.02       | 0.01       | 0.01       | 0.01       | 0.01       | 0.01       | 0.01       | 0.01       | 0.01       | 0.01       | 0.01       | 0.01       | 0.01       | 0.02       | 0.01       |
| Anna's   | 0.06                             | 0.11       | 0.03       | 0.01       | 0.04       | 0.02       | 0.06       | 0.01       | 0.01       | 0.01       | 0.01       | 0.02       | 0.03       | 0.01       | 0.01       | 0.02       | 0.01       |
| Rufous   | 0.04                             | 0.04       | 0.04       | 0.01       | 0.03       | 0.02       | 0.03       | 0.01       | 0.01       | 0.01       | 0.01       | 0.02       | 0.03       | 0.01       | 0.01       | 0.03       | 0.01       |
| Grand    |                                  |            |            |            |            |            |            |            |            |            |            |            |            |            |            |            |            |
| Mean     | 0.05                             | 0.05       | 0.12       | 0.01       | 0.03       | 0.01       | 0.04       | 0.01       | 0.01       | 0.01       | 0.01       | 0.03       | 0.03       | 0.01       | 0.02       | 0.03       | 0.01       |
| SE       | 0.02                             | 0.01       | 0.06       | 0.00       | 0.01       | 0.00       | 0.01       | 0.00       | 0.00       | 0.00       | 0.00       | 0.01       | 0.00       | 0.00       | 0.00       | 0.00       | 0.00       |
| Species  | Mean sugar / mean sucralose      |            |            |            |            |            |            |            |            |            |            |            |            |            |            |            |            |
|          | <u>Suc</u>                       | <u>Meb</u> | <u>Mal</u> | <u>Tre</u> | <u>Glc</u> | <u>Frc</u> | <u>Xyl</u> | <u>Man</u> | <u>Ara</u> | <u>Gal</u> | <u>Rib</u> | <u>Raf</u> | <u>Mez</u> |            |            |            |            |
| Jacobin  | 0.24                             | 0.02       | 0.03       | 0.02       | 0.03       | 0.06       | 0.03       | 0.03       | 0.04       | 0.03       | 0.03       | 0.03       | 0.03       |            |            |            |            |
| Hermit   | 0.14                             | 0.06       | 0.09       | 0.07       | 0.06       | 0.12       | 0.06       | 0.06       | 0.09       | 0.05       | 0.05       | 0.05       | 0.05       |            |            |            |            |
| Fairy    | 0.07                             | 0.01       | 0.02       | 0.02       | 0.01       | 0.03       | 0.01       | 0.02       | 0.03       | 0.02       | 0.02       | 0.02       | 0.02       |            |            |            |            |
| Puffleg  | 0.21                             | 0.01       | 0.03       | 0.02       | 0.01       | 0.03       | 0.01       | 0.02       | 0.06       | 0.03       | 0.02       | 0.04       | 0.03       |            |            |            |            |
| Coquette | 0.34                             | 0.05       | 0.07       | 0.05       | 0.05       | 0.12       | 0.05       | 0.05       | 0.10       | 0.06       | 0.04       | 0.09       | 0.06       |            |            |            |            |
| Giant    | 0.16                             | 0.02       | 0.04       | 0.02       | 0.02       | 0.05       | 0.02       | 0.02       | 0.05       | 0.03       | 0.02       | 0.03       | 0.03       |            |            |            |            |
| Anna's   | 0.31                             | 0.07       | 0.11       | 0.08       | 0.06       | 0.20       | 0.07       | 0.06       | 0.15       | 0.08       | 0.06       | 0.09       | 0.12       |            |            |            |            |
| Rufous   | 0.32                             | 0.02       | 0.07       | 0.04       | 0.02       | 0.08       | 0.02       | 0.04       | 0.08       | 0.05       | 0.03       | 0.05       | 0.05       |            |            |            |            |
| Grand    |                                  |            |            |            |            |            |            |            |            |            |            |            |            |            |            |            |            |
| Mean     | 0.23                             | 0.03       | 0.06       | 0.04       | 0.03       | 0.09       | 0.03       | 0.04       | 0.08       | 0.04       | 0.03       | 0.05       | 0.05       |            |            |            |            |
| SE       | 0.03                             | 0.01       | 0.01       | 0.01       | 0.01       | 0.02       | 0.01       | 0.01       | 0.01       | 0.01       | 0.00       | 0.01       | 0.01       |            |            |            |            |

290

291

292

293

294

295

296

297

298

299

300

301

302



303 **Supplemental Table 3.** Location of AR2 residues in T1R1 CRD-TMD.

304 Number of differences (between AR1 and AR2) for each transmembrane helix (TM),  
305 extracellular loop (ECL), intracellular loop (ICL) and C-terminus are presented separately.  
306 Most differences (standardized by region length) occur in ECL2 and TM7. Predicted selected  
307 sites from MEME and CODEML analyses are indicated, as are residues that overlap with  
308 sites of known function from other studies.

309

310

311

312

313

314

315

316

317

318

319

320

321

322

323

324

325

**Supplemental Table 3. Location of AR2 residues in T1R1 CRD-TMD**

| Domain     | Length | Synonymous sites | Non-synonymous sites | Proportion non-synonymous sites | MEME & PAML sites          | Known functional sites                                                                           |
|------------|--------|------------------|----------------------|---------------------------------|----------------------------|--------------------------------------------------------------------------------------------------|
| CRD        | 68     | 57               | 11                   | 0.16                            |                            | #491 sugars (Toda et al. 2021) #548 thaumatin (Masuda et al. 2013)                               |
| TM1        | 24     | 20               | 4                    | 0.17                            |                            |                                                                                                  |
| ICL1       | 13     | 12               | 1                    | 0.08                            |                            |                                                                                                  |
| TM2        | 21     | 18               | 3                    | 0.14                            | #606 MEME                  |                                                                                                  |
| ECL1       | 5      | 5                | 0                    | 0.00                            |                            |                                                                                                  |
| TM3        | 34     | 30               | 4                    | 0.12                            |                            | #626 sugars (Toda et al. 2021) and cyclamate (Jiang et al. 2005), #641 sugars (Toda et al. 2021) |
| ICL2       | 14     | 14               | 0                    | 0.00                            |                            |                                                                                                  |
| TM4        | 26     | 25               | 1                    | 0.04                            |                            |                                                                                                  |
| ECL2       | 19     | 14               | 5                    | 0.26                            | #702 MEME                  |                                                                                                  |
| TM5        | 29     | 26               | 3                    | 0.10                            | #716 MEME                  |                                                                                                  |
| ICL3       | 2      | 2                | 0                    | 0.00                            |                            |                                                                                                  |
| TM6        | 28     | 27               | 1                    | 0.04                            |                            | #743 monosodium glutamate (Dang et al. 2019)                                                     |
| ECL3       | 7      | 7                | 0                    | 0.00                            |                            |                                                                                                  |
| TM7        | 26     | 20               | 6                    | 0.23                            | #784 MEME<br>#793 PAML(M8) | #784 lactisol (Xu et al. 2004), #786 methional (Toda et al. 2018)                                |
| C-terminus | 25     | 24               | 1                    | 0.04                            |                            |                                                                                                  |
| SUM        | 341    | 301              | 40                   | 0.12                            |                            |                                                                                                  |

327 **Supplemental Table 4:** Sample sizes for behavioral trials with wild hummingbirds.  
328 Top: number of visits (all species and both sexes, pooled and shown separately) to feeders  
329 containing carbohydrates or water. Occasional visits by Allen’s hummingbirds are included in  
330 the “all-birds” column. Bottom: number of visits (all birds, and Anna’s hummingbird males  
331 shown separately) to feeders containing water or amino acids (trials were repeated 2 – 4  
332 times and visits were pooled).

333  
334  
335  
336  
337  
338  
339  
340  
341  
342  
343  
344  
345  
346  
347  
348  
349  
350  
351  
352  
353  
354  
355  
356  
357  
358

**Supplemental Table 4. Sample sizes for behavioral trials with wild hummingbirds**

| Carbohydrates   |            |              |                     |         |
|-----------------|------------|--------------|---------------------|---------|
|                 | All birds  | Anna's males | Black-chinned males | Females |
| Sucrose         | 138        | 24           | 28                  | 78      |
| Fructose        | 144        | 45           | 63                  | 34      |
| Glucose         | 59         | 14           | 16                  | 28      |
| All birds       |            |              |                     |         |
| Fructose        | 164        |              |                     |         |
| Glucose         | 59         |              |                     |         |
| Water           | 57         |              |                     |         |
| Amino acids     |            |              |                     |         |
|                 | All birds  |              | Anna's males        |         |
|                 | Amino acid | Water        | Amino acid          | Water   |
| Alanine (1.5M)  | 98         | 114          | 34                  | 50      |
| Glycine (1.5M)  | 223        | 110          | 42                  | 31      |
| Serine (1.5M)   | 185        | 79           | 65                  | 26      |
| Proline (1.5M)  | 62         | 74           | 25                  | 32      |
|                 | All birds  |              | Anna's males        |         |
| Serine (500 mM) | 36         | 28           | 22                  | 14      |

359

360

361

362

363

364

365

366

367

368

369

370

371

372 References

- 373 Baldwin MW, Toda Y, Nakagita T, O'Connell MJ, Klasing KC, Misaka T, Edwards S V.,  
374 Liberles SD. 2014. Evolution of sweet taste perception in hummingbirds by transformation of  
375 the ancestral umami receptor. *Science* (80- ). 345(6199):929–933.  
376 doi:10.1126/science.1255097. <http://www.sciencemag.org/cgi/doi/10.1126/science.1255097>.
- 377 Dang Y, Hao L, Cao J, Sun Y, Zeng X, Wu Z, Pan D. 2019. Molecular docking and  
378 simulation of the synergistic effect between umami peptides, monosodium glutamate and  
379 taste receptor T1R1/T1R3. *Food Chem.* 271(March 2018):697–706.  
380 doi:10.1016/j.foodchem.2018.08.001. <https://doi.org/10.1016/j.foodchem.2018.08.001>.
- 381 Jiang P, Cui M, Zhao B, Snyder LA, Benard LMJ, Osman R, Max M, Margolskee RF. 2005.  
382 Identification of the cyclamate interaction site within the transmembrane domain of the  
383 human sweet taste receptor subunit T1R3. *J Biol Chem.* 280(40):34296–34305.  
384 doi:10.1074/jbc.M505255200.
- 385 Masuda T, Taguchi W, Sano A, Ohta K, Kitabatake N, Tani F. 2013. Five amino acid  
386 residues in cysteine-rich domain of human T1R3 were involved in the response for sweet-  
387 tasting protein, thaumatin. *Biochimie.* 95(7):1502–1505. doi:10.1016/j.biochi.2013.01.010.  
388 <http://dx.doi.org/10.1016/j.biochi.2013.01.010>.
- 389 Murrell B, Wertheim JO, Moola S, Weighill T, Scheffler K, Kosakovsky Pond SL. 2012.  
390 Detecting individual sites subject to episodic diversifying selection. Malik HS, editor. *PLoS*  
391 *Genet.* 8(7). doi:10.1371/journal.pgen.1002764.  
392 <https://dx.plos.org/10.1371/journal.pgen.1002764>.
- 393 Smith MD, Wertheim JO, Weaver S, Murrell B, Scheffler K, Kosakovsky Pond SL. 2015.  
394 Less is more: an adaptive branch-site random effects model for efficient detection of  
395 episodic diversifying selection. *Mol Biol Evol.* 32(5):1342–1353.  
396 doi:10.1093/molbev/msv022. [https://academic.oup.com/mbe/article-](https://academic.oup.com/mbe/article-lookup/doi/10.1093/molbev/msv022)  
397 [lookup/doi/10.1093/molbev/msv022](https://academic.oup.com/mbe/article-lookup/doi/10.1093/molbev/msv022).
- 398 Toda Y, Ko M, Liang Q, Miller ET, Rico-Guevara A, Nakagita T, Sakakibara A, Uemura K,  
399 Sackton T, Hayakawa T, et al. 2021. Early origin of sweet perception in the songbird  
400 radiation. *Science* (80- ). 373(6551):226–231. doi:10.1126/science.abf6505.  
401 <https://www.sciencemag.org/lookup/doi/10.1126/science.abf6505>.
- 402 Toda Y, Nakagita T, Hirokawa T, Yamashita Y, Nakajima A, Narukawa M, Ishimaru Y,  
403 Uchida R, Misaka T. 2018. Positive/negative allosteric modulation switching in an umami  
404 taste receptor (T1R1/T1R3) by a natural flavor compound, methional. *Sci Rep.* 8(1):1–13.  
405 doi:10.1038/s41598-018-30315-x. <http://dx.doi.org/10.1038/s41598-018-30315-x>.

406 Xu H, Staszewski L, Tang H, Adler E, Zoller M, Li X. 2004. Different functional roles of T1R  
407 subunits in the heteromeric taste receptors. *Proc Natl Acad Sci.* 101(39):14258–14263.  
408 doi:10.1073/pnas.0404384101. <http://www.pnas.org/cgi/doi/10.1073/pnas.0404384101>.

409 Yang Z. 2005. Bayes empirical bayes inference of amino acid sites under positive selection.  
410 *Mol Biol Evol.* 22(4):1107–1118. doi:10.1093/molbev/msi097.  
411 <https://academic.oup.com/mbe/article-lookup/doi/10.1093/molbev/msi097>.

412 Yang Z. 2007. PAML: a program package for phylogenetic analysis by maximum likelihood  
413 4.8a. *Mol Biol Evol.* 24(5):1586–1591.

414
